# Supplementary material for: Effect of UV light-induced nitrogen doping on the field effect transistor characteristics of graphene
Source: Royal Society of Chemistry journal article supplement (doi:10.1039/c5ra12002k), 2015-01-01
Supplement: c5ra12002k1.pdf [file c5ra12002k1.pdf]

# Effect of UV light-induced nitrogen doping on the field effect transistor characteristics of graphene

Gaku Imamura<sup>a,b\*</sup> and Koichiro Saiki<sup>b</sup>

<sup>a</sup>World Premier International (WPI) Research Center, International Center for Materials Nanoarchitectonics (MANA), National Institute for Materials Science (NIMS), 1-1 Namiki, Tsukuba, Ibaraki 305-0044, Japan

<sup>b</sup>Department of Complexity Science & Engineering, Graduate School of Frontier Sciences, The University of Tokyo, Kashiwanoha 5-1-5, Kashiwa, Chiba 277-8561, Japan

\*Corresponding author; Tel: +81-29-851-3354 (ext. 4186). Fax: +81-29-860-4706. E-mail: IMAMURA.Gaku@nims.go.jp

According to the phenomenological model proposed by Lucchese *et al.*<sup>1</sup>, there are two regions inside and outside a single defect: a structurally disordered region (S-region), and a Raman-active region (A-region) as shown in Fig. S1a. In the S-region, the honeycomb network is totally broken, which does not contribute to the D band. The A-region lies around the S-region. The selection rules for the  $A_{1g}$  vibrational mode is broken by defects in the A-region, leading to the evolution of the D band. As the intensity of the D band is proportional to the area of the A-regions, the  $I_D/I_G$  can be written as

$$I_D/I_G = C(\pi r_a^2 - \pi r_s^2) = \pi r_a^2(2r_s + r_a^2),$$

where  $C$  is a proportional constant, and  $r_a$ ,  $r_s$ ,  $r_a'$  are the length scales shown in Fig. S1a. In the case of ion-bombardment,  $r_s$  and  $r_a'$  are  $\sim 1$  nm and  $\sim 2$  nm, respectively<sup>1</sup>. In contrast to the defects caused by ion-bombardment,  $r_s$  is even smaller for an  $sp^3$  carbon atom as a bonding structurally breaks only one carbon atom<sup>2</sup>.(Fig. S1b) Assuming that  $r_a'$  is constant regardless of the type of defects, the area of the A-regions for  $sp^3$  carbon atoms is estimated to be smaller compared to the defects caused by ion-bombardment.(Fig. S1c) Considering that defects caused by UV-irradiation in  $NH_3$  are  $sp^3$ -like bonds and amino groups, it is reasonable that the defect density judged from  $I_D/I_G$  is vastly underestimated.

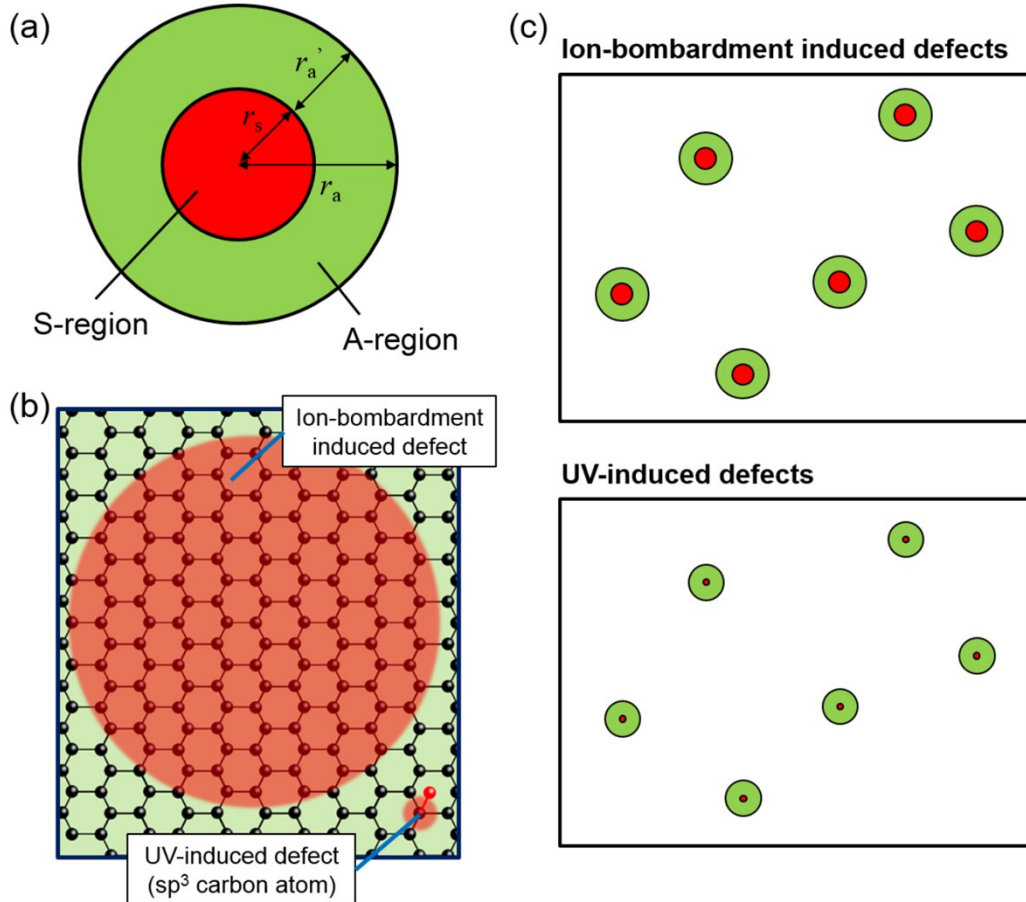

Figure S1. (a) Model for a single defect. Definition of S-region, A-region,  $r_s$ ,  $r_a$  and  $r_a'$ . (b) Comparison of the defects caused by ion-bombardment and UV-irradiation. (c) Comparison of the defects distributed with the same defect density.

## REFERENCES

1. M.M. Lucchese, F. Stavale, E.H.M. Ferreira, C. Vilani, M.V.O. Moutinho, R.B. Capaz, C.A. Achete, A. Jorio, *Carbon*, 2010, **48**, 1592–1597.
2. S. Niyogi, E. Bekyarova, M.E. Itkis, H. Zhang, K. Shepperd, J. Hicks, M. Sprinkle, C. Berger, C.N. Lau, W.A. deHeer, E.H. Conrad, R.C. Haddon, *Nano Lett.*, 2010, **10**, 4061–4066.
